# Supplementary material for: An arabinogalactan from Lycium barbarum attenuates DSS-induced chronic colitis in C57BL/6J mice associated with the modulation of intestinal barrier function and gut microbiota
Source: Royal Society of Chemistry journal article supplement (doi:10.1039/d1fo01200b), 2021-01-01
Supplement: d1fo01200b1.pdf [file d1fo01200b1.pdf]

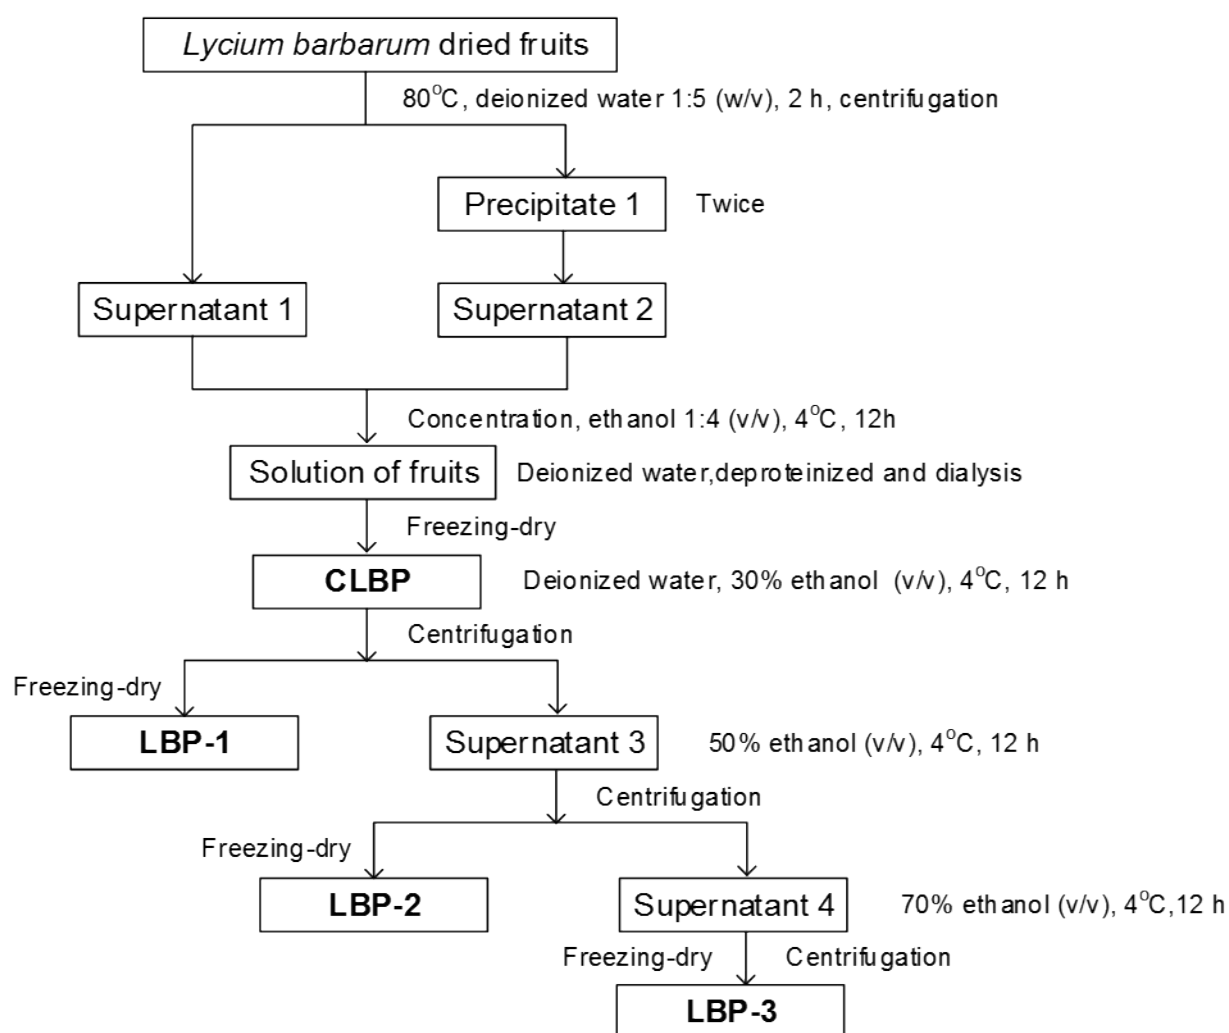

Fig. S1

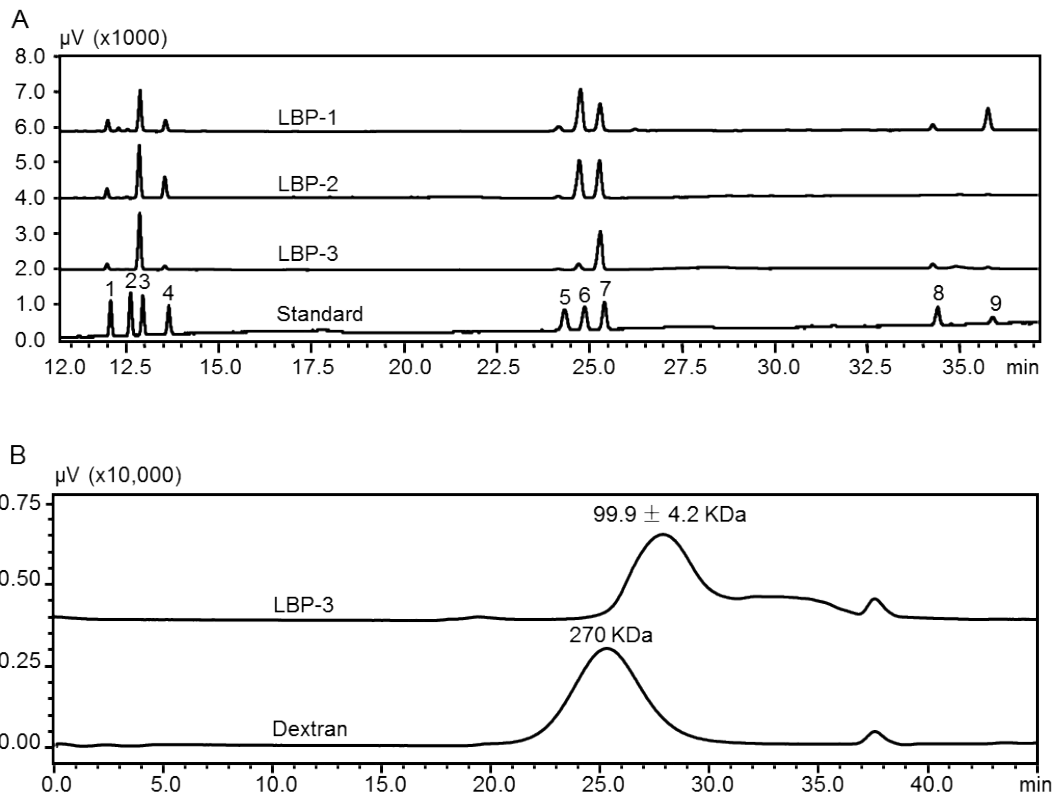

**Fig. S2**

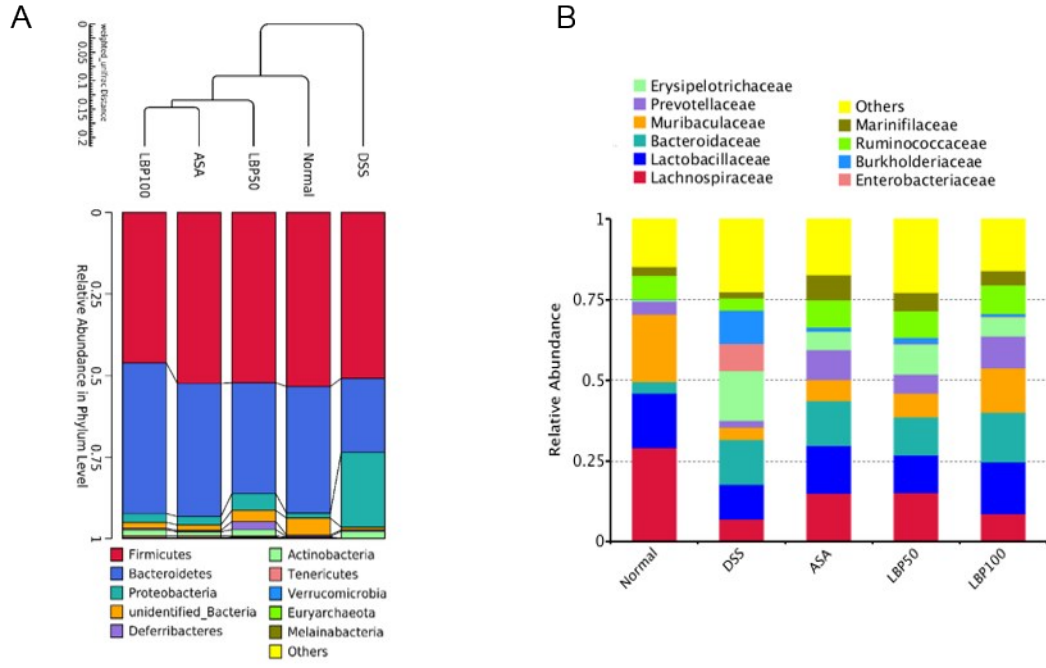

**Fig. S3**

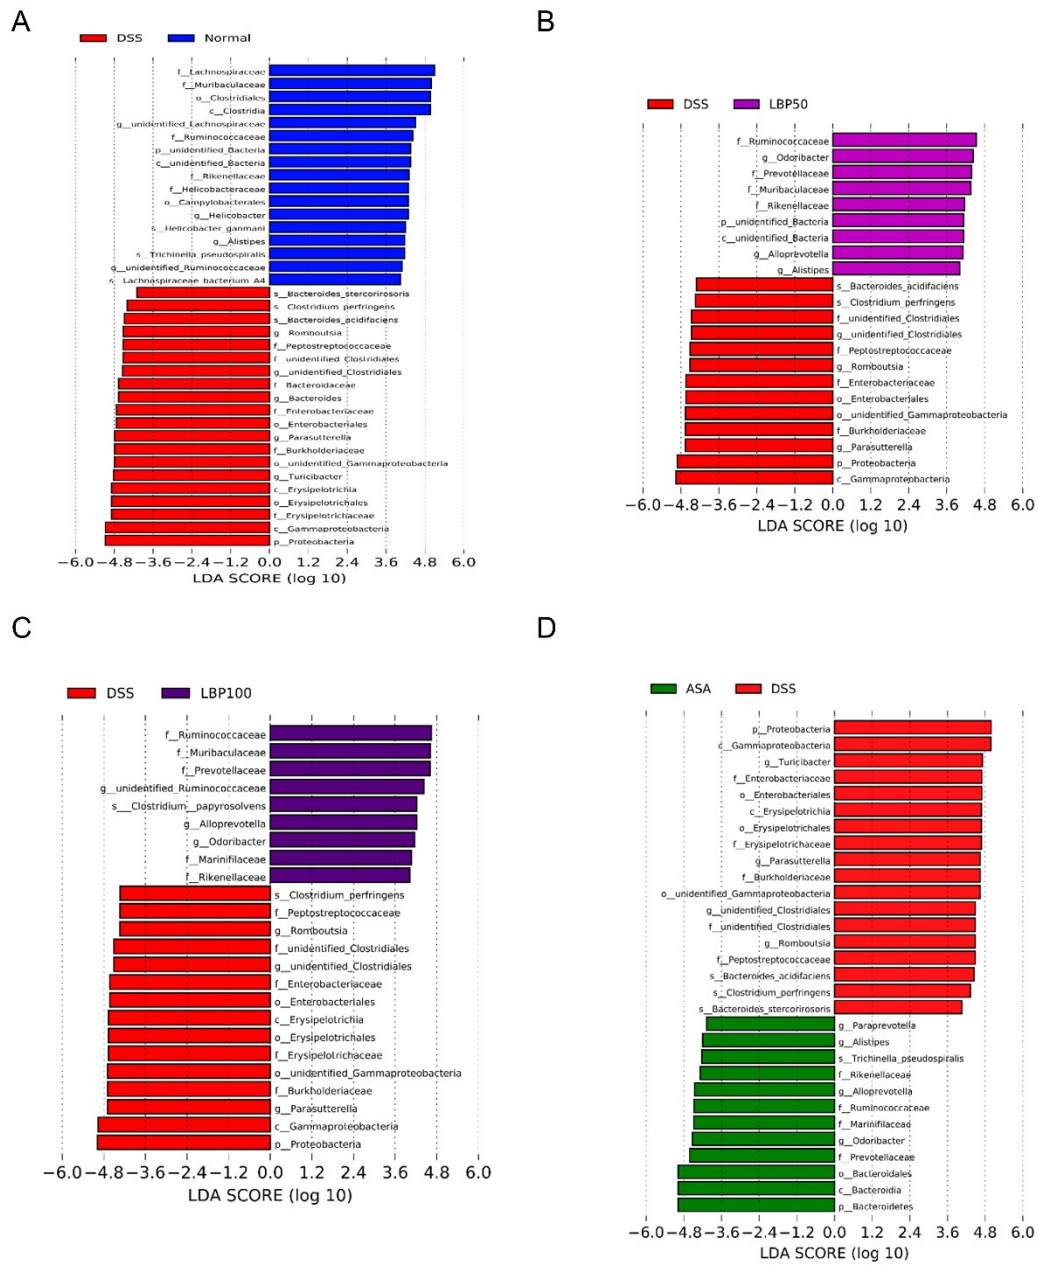

Fig. S4

---

**Fig. S1** Extraction of polysaccharides from *Lycium barbarum*.

**Fig. S2** Chemical characterization of LBPs. Monosaccharide composition of LBP-1, LBP-2 and LBP-3 (A), and molecular weight of LBP-3 (B). Peaks: 1-rhamnose, 2-fucose, 3-arabinose, 4-xylose, 5-mannose, 6-glucose, 7-galactose, 8-glucuronic acid, 9-galacturonic acid (B).

**Fig. S3** The relative quantitation of domain bacteria at phylum (A) and family (B).

**Fig. S4** LEfSe analysis of intestinal microbial community composition indicated the predominant microbiota between Normal and DSS groups (A), LBP50 and DSS groups (B), LBP100 and DSS groups (C), and ASA and DSS groups (D). (Log<sub>10</sub> LDA score threshold of 4).

**Table S1** The detailed criteria for DAI scoring

| Score | Weight loss rate | Stool consistency                    | Hematochezia status                     |
|-------|------------------|--------------------------------------|-----------------------------------------|
| 0     | 0%               | Normal                               | Normal                                  |
| 1     | 0.1%-5%          | Loose with regular shape             | small amount of blood in some stool (+) |
| 2     | 5%-10%           | Loose with less regular shape, pasty | blood in stool regularly seen (++)      |
| 3     | 10%-20%          | Diarrhea with loose shape            | blood in all stool (++++)               |
| 4     | >20%             | Diarrhea without shape               | blood in all stool (++++)               |

**Table S2** Sequences of primers used in this study

| Gene            | Primer sequences                                                         |
|-----------------|--------------------------------------------------------------------------|
| <i>β-actin</i>  | F: 5'- TCAGCAAGCAGGAGTACGATG -3'<br>R: 5'- AACGCAGCTCAGTAACAGTCC -3'     |
| <i>ZO-1</i>     | F: 5'- GGGGCCTACACTGATCAAGA -3'<br>R: 5'- TGGAGATGAGGCTTCTGCT -3'        |
| <i>Occludin</i> | F: 5'- ACGGACCCTGACCACTATGA -3'<br>R: 5'- TCAGCAGCAGCCATGTACTC -3'       |
| <i>Claudin1</i> | F: 5'- AGATACAGTGCAAAGTCTTCGA -3'<br>R: 5'- CAGGATGCCAATTACCATCAAG -3'   |
| <i>MUC2</i>     | F: 5'- GGTGTTACCTGCTCCAAGGC -3'<br>R: 5'- CATGGTGGCCCTCTTCCAAC -3'       |
| <i>TNF-α</i>    | F: 5'- GTGCCAGCCGATGGGTTGTAC -3'<br>R: 5'- TGACGGCAGAGAGGAGGTTGAC -3'    |
| <i>IL-1β</i>    | F: 5'- TTCATCTTTGAAGAAGAGCCCAT -3'<br>R: 5'- TCGGAGCCTGTAGTGCAGTT -3'    |
| <i>iNOS</i>     | F: 5'- GGCAGAATGAGAAGCTGAGG-3'<br>R: 5'- GAAGGCGTAGCTGAACAAGG -3'        |
| <i>COX-2</i>    | F: 5'- CATGAGCCGTCCCCTCACTAGG -3'<br>R: 5'- TGGTCGGTTTGATGCTACTGTTGC -3' |

**Table S3** Chemical composition and yield of CLBP, LBP-1, LBP-2 and LBP-3

|                     | CLBP                      | LBP-1                     | LBP-2                     | LBP-3                     |
|---------------------|---------------------------|---------------------------|---------------------------|---------------------------|
| Sugar content       | 67.62 ± 0.58 <sup>b</sup> | 36.11 ± 2.14 <sup>d</sup> | 45.47 ± 1.57 <sup>c</sup> | 76.51 ± 0.57 <sup>a</sup> |
| Protein content     | 43.21 ± 1.15 <sup>b</sup> | 47.03 ± 0.11 <sup>a</sup> | 35.97 ± 1.22 <sup>c</sup> | 27.63 ± 0.75 <sup>d</sup> |
| Uronic acid content | 13.89 ± 0.49 <sup>b</sup> | 19.38 ± 1.04 <sup>a</sup> | 12.58 ± 0.90 <sup>b</sup> | 8.96 ± 0.99 <sup>c</sup>  |
| Yield (%)           | 0.65 ± 0.13               | 0.055 ± 0.05              | 0.058 ± 0.04              | 0.257 ± 0.05              |

**Table S4** Monosaccharide composition of LBP-1, LBP-2 and LBP-3

| Sample | Rha  | Ara  | Xyl  | Man  | Glc  | Gal  | GlcA  | GalA  |
|--------|------|------|------|------|------|------|-------|-------|
| LBP-1  | 0.25 | 1.00 | 0.38 | 0.19 | 1.42 | 0.81 | 0.23  | 2.28  |
| LBP-2  | 0.16 | 1.00 | 0.54 | 0.07 | 1.00 | 0.85 | trace | trace |
| LBP-3  | 0.08 | 1.00 | 0.08 | 0.03 | 0.14 | 0.82 | 0.13  | 0.12  |

Rha-rhamnose, Ara-arabinose, Xyl-xylose, Man-mannose, Glc-glucose, Gal-galactose, GlcA-glucuronic acid, GalA-galacturonic acid

---

**Table S5** Diet composition

| Nutrient | Content (g/kg) |
|----------|----------------|
| Moisture | 100            |
| Protein  | 201.8          |
| Fat      | 46             |
| Fibre    | 49             |
| Ash      | 66             |
| Ca       | 11.4           |
| P        | 9.1            |

**Feed ingredients:** corn, soybean meal, wheat bran, wheat flour, fish meal, salt, calcium bicarbonate, vitamin mix, mineral mix, amino acid, etc.
